# Supplementary material for: Systematic study on the optimization of a bis(N,N-diethyl)aniline based NLO chromophore via a stronger electron acceptor, extended π-conjugation and isolation groups
Source: Royal Society of Chemistry journal article supplement (doi:10.1039/d1tc05684k), 2022-01-01
Supplement: d1tc05684k1.pdf [file d1tc05684k1.pdf]

## Supporting Information

### **Systematic study on optimization of bis(N,N-diethyl)aniline based NLO chromophore via stronger electron acceptor, extended $\pi$ - conjugation and isolation groups**

Shuhui Bo,<sup>\* a,b</sup> Ya Li,<sup>a</sup> Tongtong Liu,<sup>a</sup> Fuyang Huo,<sup>a</sup> Hongyan Xiao,<sup>b</sup> Hua Zhang,<sup>\*,b,c</sup> and Zhuo Chen<sup>\*,b</sup>

<sup>a</sup> Optoelectronics Research Centre, School of Science, Minzu University of China, Beijing, 100081, PR China. E-mail: boshuhui@muc.edu.cn, boshuhui@mail.ipc.ac.cn.

<sup>b</sup> Key Laboratory of Bio-inspired Materials and Interfacial Science, Technical Institute of Physics and Chemistry, Chinese Academy of Sciences, Beijing, 100190, PR China. E-mail: chenzhuo@mail.ipc.ac.cn.

<sup>c</sup> Beijing National Laboratory for Condensed Matter Physics and Institute of Physics, Chinese Academy of Sciences, Beijing 100190, PR China. E-mail: zhanghua@iphy.ac.cn.

1.  $^1\text{H}$  NMR spectra

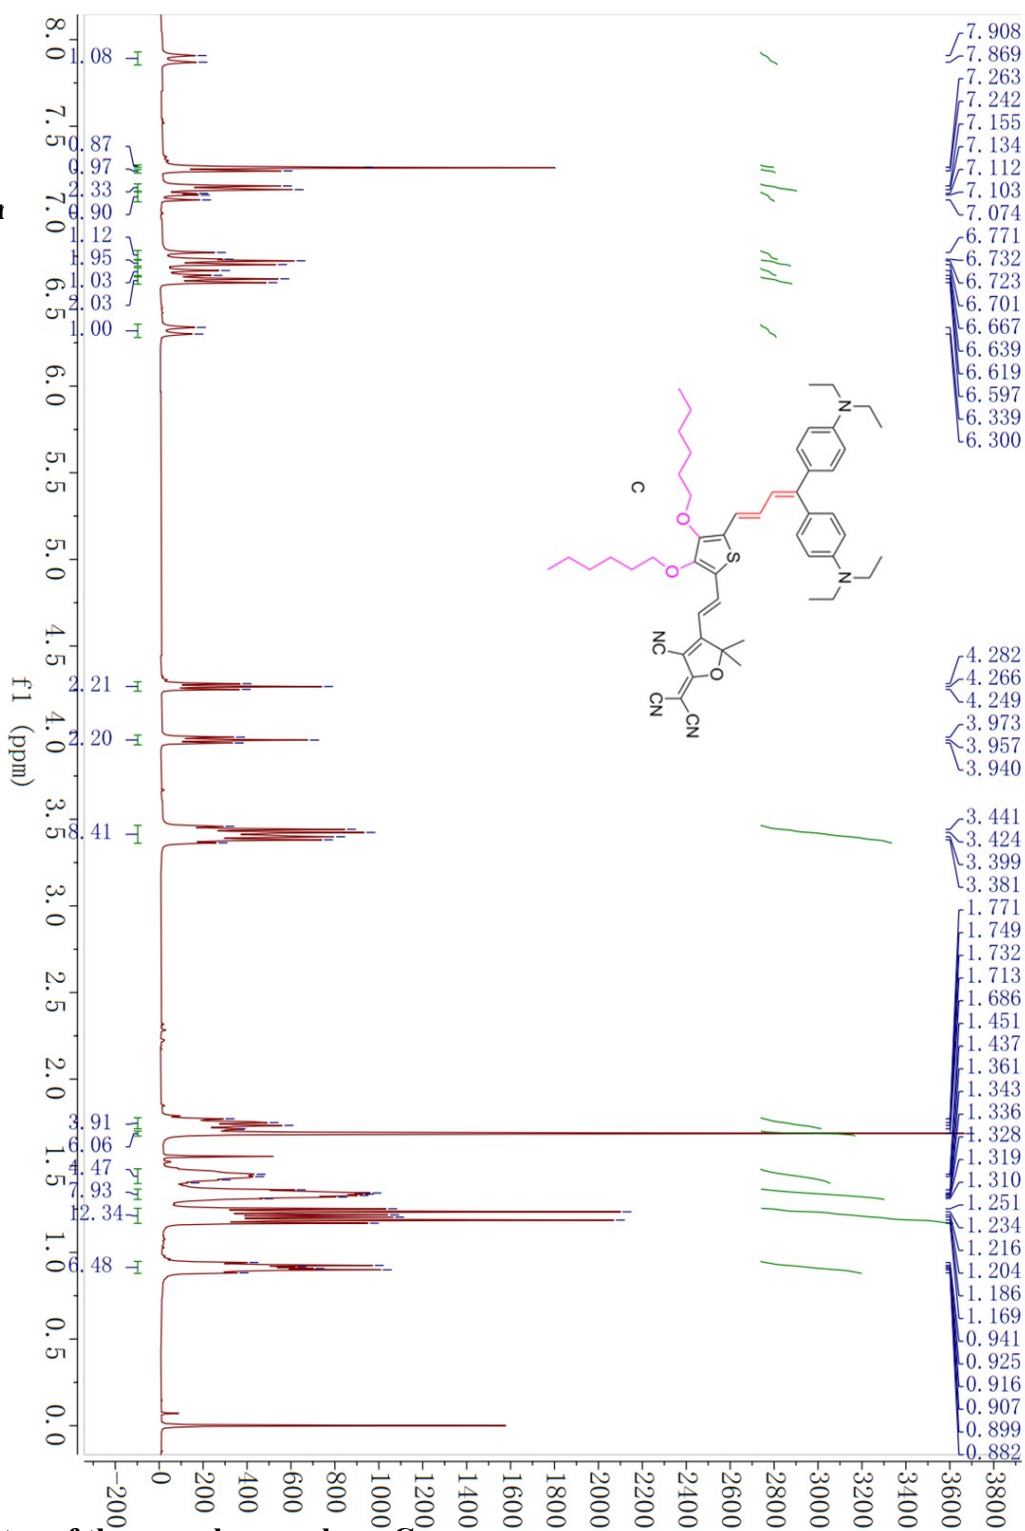

2.  $^{13}\text{C}$  NMR spectra of the new chromophore C.

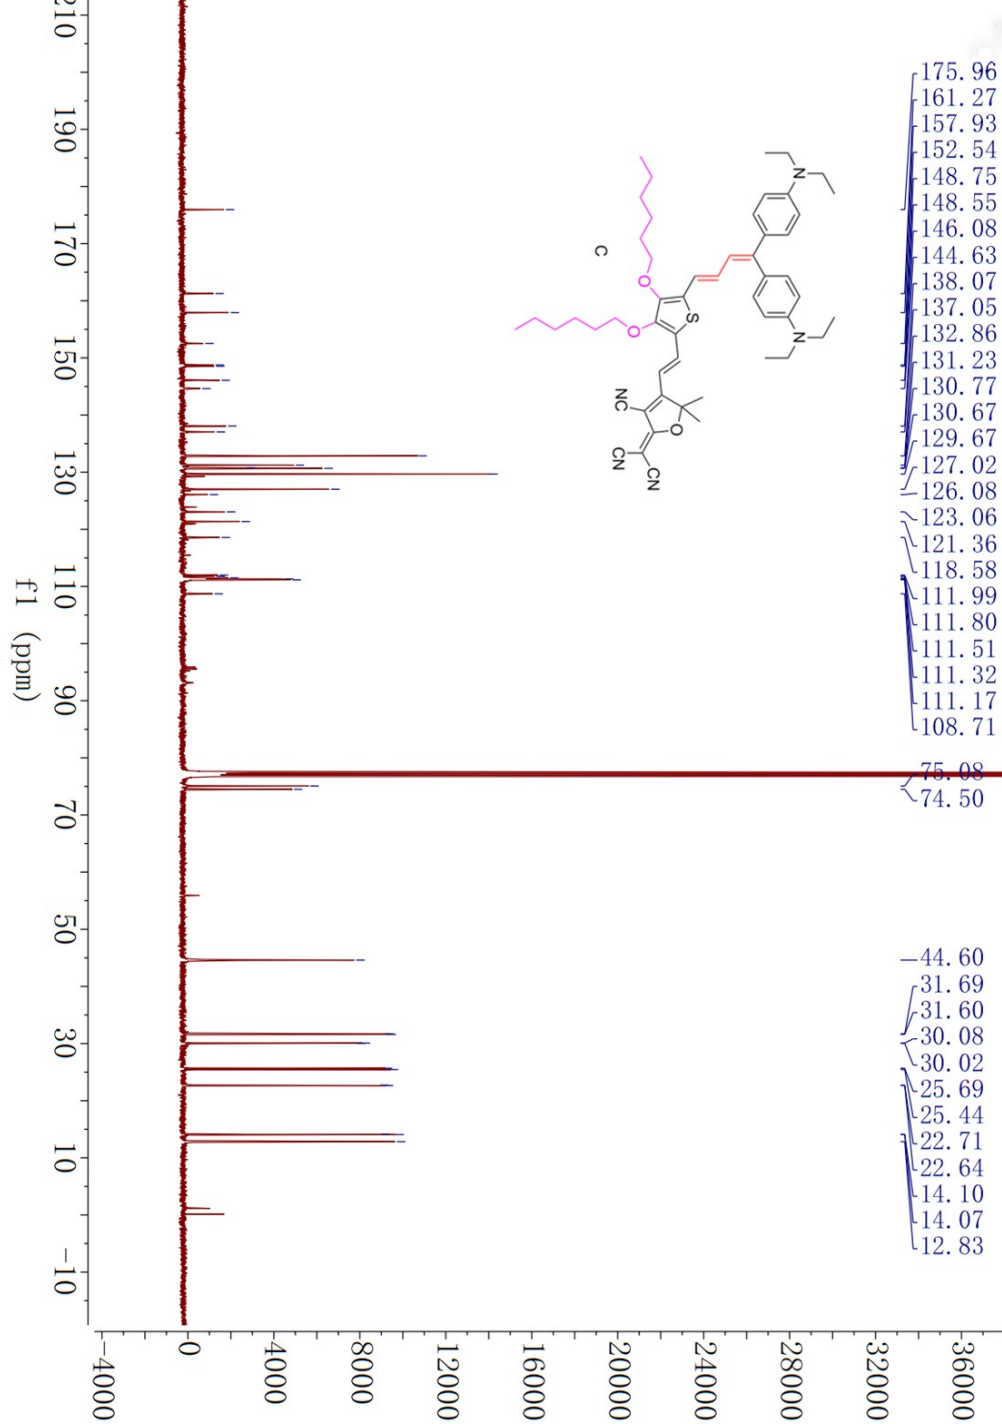

### 3. <sup>1</sup>H NMR spectra of the new chromophore F.

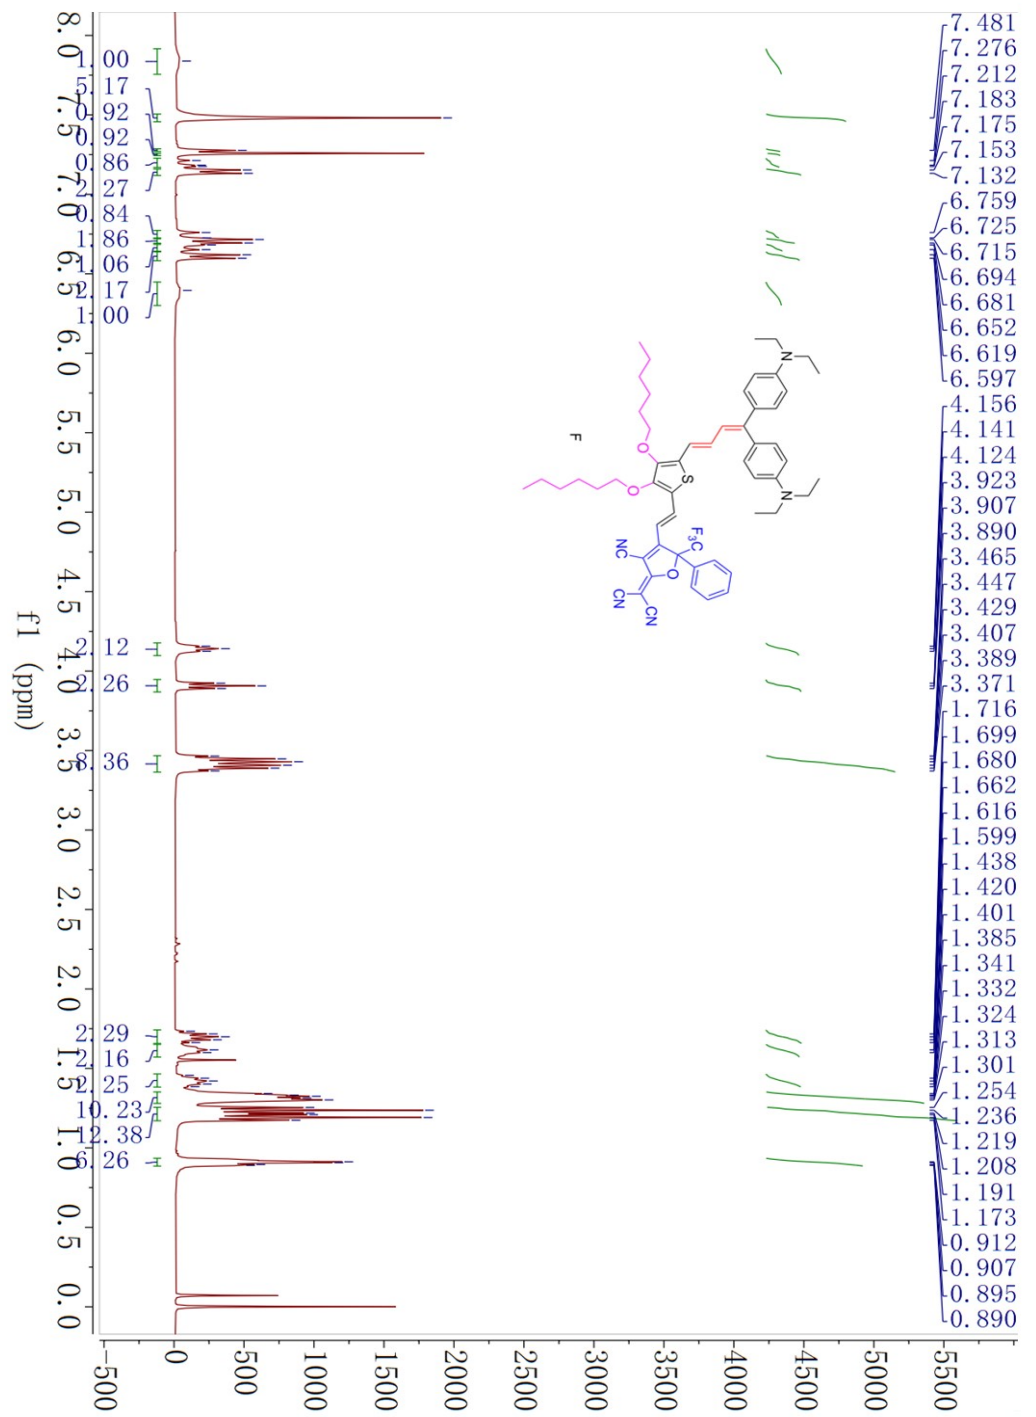

#### 4. $^{13}\text{C}$ NMR spectra of the new chromophore F.

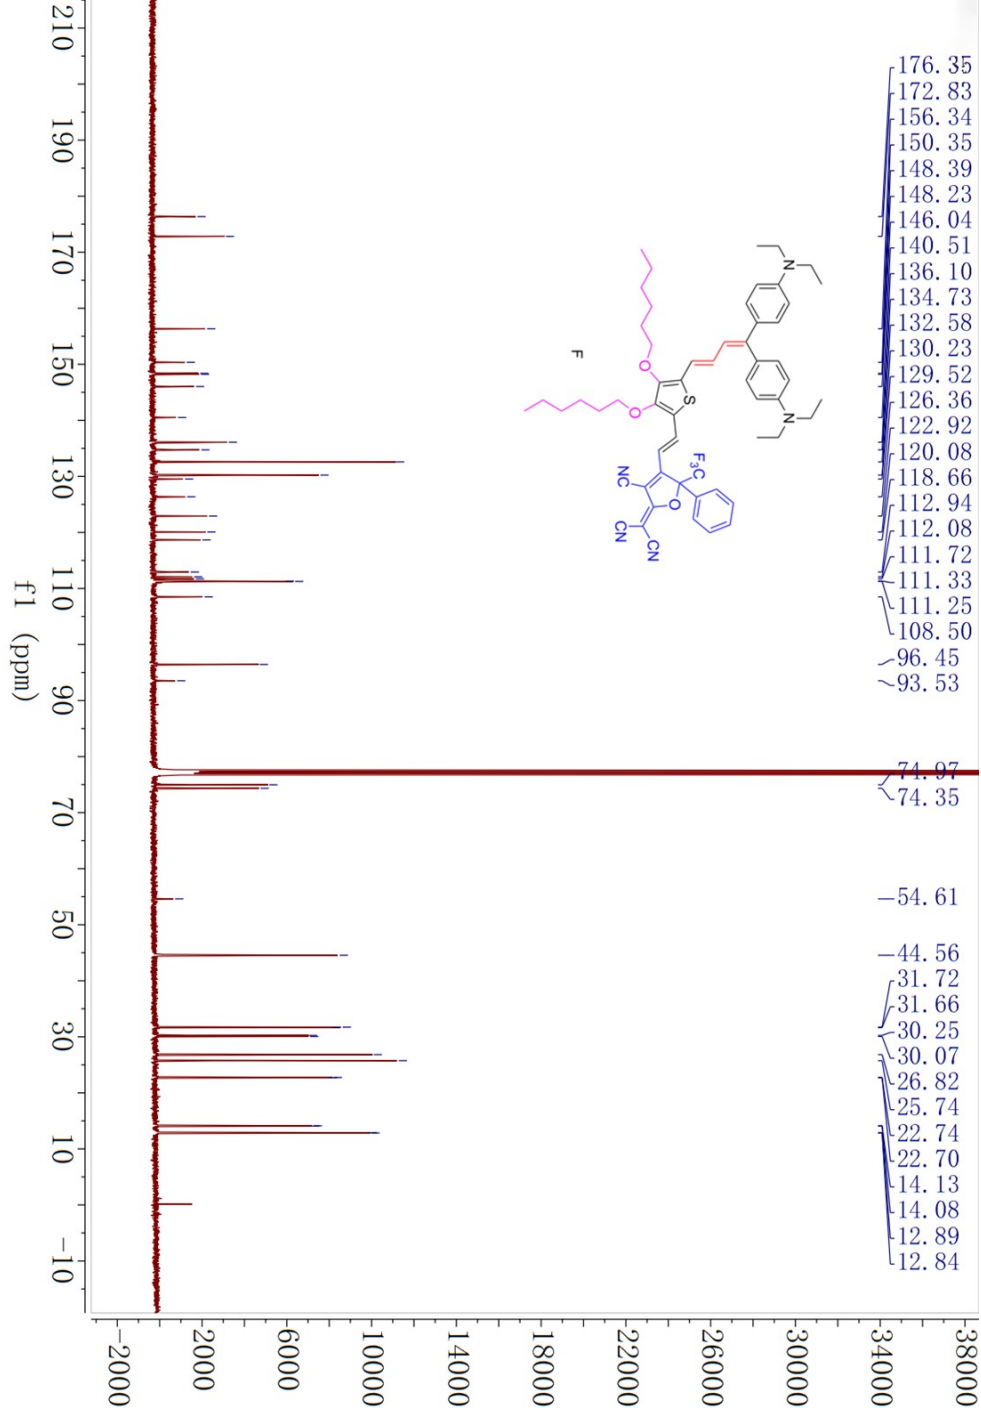

## 5. The solvatochromic shifts in eV and the extinction coefficients in UV-Vis spectra.

Table S1. The solvatochromic shifts in eV and values of the extinction coefficients.

| Compound | Properties                     | dioxane | THF  | CHCl <sub>3</sub> | acetone | acetonitrile | DMF  |
|----------|--------------------------------|---------|------|-------------------|---------|--------------|------|
| A        | $\Delta E/eV$                  | 1.89    | 1.85 | 1.74              | 1.85    | 1.86         | 1.82 |
|          | $\epsilon/10^4 M^{-1} cm^{-1}$ | 4.19    | 3.71 | 4.41              | 3.72    | 3.81         | 3.22 |
| B        | $\Delta E/eV$                  | 1.83    | 1.77 | 1.69              | 1.78    | 1.77         | 1.72 |
|          | $\epsilon/10^4 M^{-1} cm^{-1}$ | 5.48    | 5.05 | 6.09              | 5.47    | 5.15         | 4.42 |
| C        | $\Delta E/eV$                  | 1.77    | 1.72 | 1.61              | 1.73    | 1.73         | 1.69 |
|          | $\epsilon/10^4 M^{-1} cm^{-1}$ | 5.01    | 5.45 | 5.63              | 5.46    | 5.45         | 4.99 |
| D        | $\Delta E/eV$                  | 1.66    | 1.58 | 1.51              | 1.55    | ----         | ---- |

|   |                                            |      |      |      |      |      |      |
|---|--------------------------------------------|------|------|------|------|------|------|
|   | $\epsilon/10^4\text{M}^{-1}\text{cm}^{-1}$ | 6.01 | 5.85 | 7.67 | 5.63 | ---- | ---- |
| E | $\Delta E/\text{eV}$                       | 1.61 | 1.53 | 1.49 | 1.48 | ---- | ---- |
|   | $\epsilon/10^4\text{M}^{-1}\text{cm}^{-1}$ | 6.59 | 6.95 | 8.01 | 7.17 | ---- | ---- |
| F | $\Delta E/\text{eV}$                       | 1.56 | 1.47 | 1.39 | 1.45 | 1.46 | 1.34 |
|   | $\epsilon/10^4\text{M}^{-1}\text{cm}^{-1}$ | 5.49 | 5.63 | 5.87 | 5.22 | 5.09 | 0.52 |

## 6. The data of $\beta_i$ and $\beta_{\text{tot}}$ for the chromophores.

Table S2. The data of  $\beta_i$  and  $\beta_{\text{tot}}$  for the chromophores.

| Comp | $\beta_{\text{xxx}}$        | $\beta_{\text{xyy}}$ | $\beta_{\text{xzz}}$ | $\beta_{\text{yyy}}$ | $\beta_{\text{yzz}}$ | $\beta_{\text{yxx}}$ | $\beta_{\text{zzz}}$ | $\beta_{\text{zxx}}$ | $\beta_{\text{zyy}}$ | $\beta_x$ | $\beta_y$ | $\beta_z$ | $\beta_{\text{tot}}$ |
|------|-----------------------------|----------------------|----------------------|----------------------|----------------------|----------------------|----------------------|----------------------|----------------------|-----------|-----------|-----------|----------------------|
|      | $\times 10^{-30}\text{esu}$ |                      |                      |                      |                      |                      |                      |                      |                      |           |           |           |                      |
| A    | -36911.64                   | 792.9                | 110.3                | -1132                | 34.47                | -690.0               | -125.1               | -523.1               | 19.28                | 311.1     | 15.44     | 5.434     | 311.5                |
| B    | 28428.406                   | -410.7               | 9.907                | 44.042               | 8.270                | 1963.2               | -90.54               | 742.5                | -254.0               | 242.1     | 17.41     | 3.438     | 242.8                |
| C    | 38351.344                   | 4658                 | -130.6               | -1104                | -9.21                | -12943               | -119.6               | -1121                | -111.4               | 370.4     | 121.4     | 11.68     | 390.0                |
| D    | 42411.556                   | -322.3               | -68.09               | -1490                | 12.25                | 3696.2               | 194.1                | 1570                 | -131.9               | 363.0     | 19.17     | 14.10     | 363.8                |
| E    | -41794.03                   | 636.8                | -57.78               | 551.99               | 12.41                | -2428                | 178.9                | -769.4               | 286.8                | 356.1     | 16.10     | 2.623     | 356.4                |
| F    | 58006.952                   | 4026                 | 29.67                | 206.45               | -21.3                | -14432               | -62.84               | -3137                | -352.5               | 536.2     | 123.1     | 25.51     | 551.0                |

## 7. The values of glass transition temperature of the chromophore doped APC.

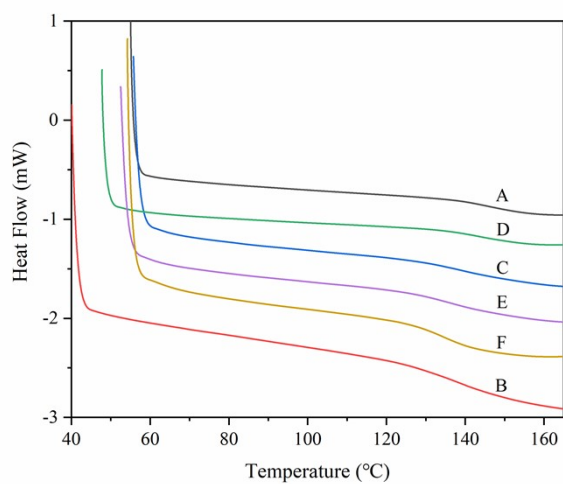

Figure S1. The DSC curves of the 25wt% chromophore doped APC

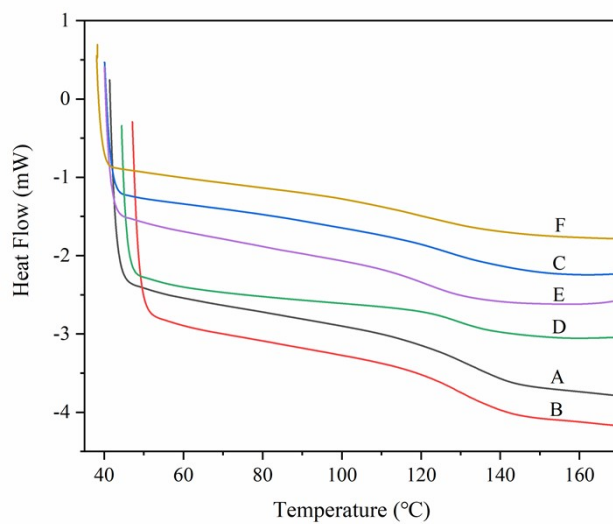

Figure S2. The DSC curves of the 35wt% chromophore doped APC

Table S3. The values of glass transition temperature ( $T_g$ ) of the chromophore doped APC

| Chromophore   | A     | B     | C     | D     | E     | F     |
|---------------|-------|-------|-------|-------|-------|-------|
| $T_g$ (25wt%) | 145.9 | 139.5 | 138.8 | 143.3 | 136.9 | 134.3 |
| $T_g$ (35wt%) | 134.3 | 128.6 | 127.3 | 129.2 | 121.9 | 118.5 |
